# Supplementary material for: A hetero-MOF-based bifunctional ratiometric fluorescent sensor for pH and water detection
Source: Royal Society of Chemistry journal article supplement (doi:10.1039/d0dt03626a), 2020-11-18
Supplement: d0dt03626a1.pdf [file d0dt03626a1.pdf]

## Supporting Information

### **A hetero-MOF-based bifunctional ratiometric fluorescence sensor for pH and water detection**

Hong Li,<sup>a</sup> Bing Liu,<sup>b</sup> Ling Xu<sup>\*a</sup> and Huan Jiao<sup>\*a</sup>

a. Key Laboratory of Macromolecular Science of Shaanxi Province, Shaanxi Key Laboratory for Advanced Energy Devices, Shaanxi Engineering Laboratory for Advanced Energy Technology, School of Chemistry & Chemical Engineering, Shaanxi Normal University, Xi'an 710062, Shaanxi Province, P. R. China

b. College of Chemistry and Chemical Engineering, Shaanxi Key Laboratory of Chemical Additives for Industry, Shaanxi University of Science and Technology, Xi'an 710021, Shaanxi Province, P. R. China

### **Experimental**

#### **Materials and methods**

The reagent and organic solvents were purchased from commercial sources. The organic solvents were distilled to remove water. Ionic liquid 1-butyl-3-methylimidazole iodide liquid ([BMI]I) was synthesized from reactions of 1-butyl iodine with 1-methylimidazole according to literature processes.<sup>1,2</sup> Degassed 1-butyl iodine was refluxed with distilled 1-methylimidazole to give the [BMI]I. [BMI]I was washed with ethyl acetate and then dried under a vacuum for at least 10 h to give [BMI]I as a brown oil. The test paper Whatman 1# for paper-based sensors was used directly without further treatment.

PXRD data for the samples were collected at ambient temperature with a Rigaku MiniFlex 600 (Japan) diffractometer (Cu-K $\alpha_{1,2}$  X-radiation,  $\lambda_1 = 1.540598 \text{ \AA}$  and  $\lambda_2 = 1.544426 \text{ \AA}$ ), equipped with an X'Celerator detector and a flat plate sample holder in a Bragg-Brentano para-focusing optics configuration (40 kV, 15 mA). Intensity data were collected by the step counting method (step being  $0.02^\circ$ ) in the continuous mode in the  $2\theta$  range of  $5\text{-}60^\circ$ . Fluorescence spectra were acquired on a Hitachi F-4600 fluorescence spectrophotometer with the excitation and emission slits set to 2.5 nm. The fluorescent decay curves of Eu<sup>3+</sup> and Tb<sup>3+</sup> in **3** were analyzed by an Edinburgh FLS 920 fluorescence spectrophotometer with a 150 W microsecond pulsed lamp as the excitation source. The quantum efficiencies of **1-3** were measured on the same a fluorescence spectrophotometer. Energy-dispersive X-ray spectroscopy (EDS) was carried on SEM (Philips-FEI Quanta 200, America). Elemental analyses of C and H were carried out on a Vario EL III elemental analyzer. FT-IR spectra

were collected from KBr pellets (Aldrich, >99%, FT-IR grade) with a Bruker Tensor 27 FT-IR spectrometer in the range of 4000-400  $\text{cm}^{-1}$ .

## Synthesis

**[Eu(OBA)(H<sub>2</sub>O)Cl] (1).** 1.5 mmol  $\text{EuCl}_3 \cdot 6\text{H}_2\text{O}$  (0.5496 g) and 0.25 mmol  $\text{H}_2\text{OBA}$  (0.0646 g) were placed in a crystallisation vial placed in a 25 mL teflon-lined stainless-steel autoclave mixed with 0.8 mL [BMI]I. The mixture was kept in a furnace at 160 °C for 1 day, and then cooled to ambient temperature. Colorless crystals suitable for X-ray diffraction were collected after clearing with ethanol. Yield based on  $\text{H}_2\text{OBA}$ : 0.0776 g, 67.58%. Elemental analysis (%), Found (calcd): C, 36.37 (36.42); H, 2.423 (2.183). FT-IR data (in KBr,  $\text{cm}^{-1}$ ) for **1**: 3352(s), 1927(w), 1597(m), 1535(m), 1392(m), 1303(w), 1261(m), 1163(m), 1097(w), 1010(w), 883(w), 854(w), 783(m), 692(w), 555(w), 501(w).

**[Tb(OBA)(H<sub>2</sub>O)Cl] (2).** Colorless crystals of **2** were obtained in a similar process to **1** with the same amount of substances of  $\text{TbCl}_3 \cdot 6\text{H}_2\text{O}$ ,  $\text{H}_2\text{OBA}$  and [BMI]I as **1**. Yield based on  $\text{H}_2\text{OBA}$ : 0.0713 g, 61.12%. Elemental analysis (%), Found (calcd): C, 35.07 (35.88); H, 2.356 (2.151). FT-IR data (in KBr,  $\text{cm}^{-1}$ ) for **2**: 3369(s), 3213(w), 3078(m), 2358(m), 2337(w), 1936(w), 1631(m), 1598(s), 1529(s), 1409(s), 1309(m), 1259(s), 1166(m), 1097(w), 1012(w), 885(m), 858(m), 781(s), 690(m), 651(s), 624(m), 559(m), 501(m), 414(m).

**[Eu<sub>0.05</sub>Tb<sub>0.95</sub>(OBA)(H<sub>2</sub>O)Cl] (3).** The preparation process of **3** is as same as **1** with mixed  $\text{EuCl}_3 \cdot 6\text{H}_2\text{O}$  (0.075 mmol, 0.0275 g),  $\text{TbCl}_3 \cdot 6\text{H}_2\text{O}$  (1.425 mmol, 0.5321 g) and 0.25 mmol  $\text{H}_2\text{OBA}$  (0.0646 g) in 0.8 mL [BMI]I. Yellow powder was collected after washing with ethanol. Yield based on  $\text{H}_2\text{OBA}$ : 0.0745 g, 63.92%. Elemental analysis (%), Found (calcd): C, 35.76 (35.91); H, 2.354 (2.153). FT-IR data (in KBr,  $\text{cm}^{-1}$ ) for **3**: 3373(s), 3213(w), 3078(w), 1936(w), 1633(w), 1599(m), 1527(s), 1406(s), 1311(w), 1257(s), 1166(m), 1097(w), 1012(w), 970(w), 885(w), 858(w), 779(s), 692(m), 650(w), 625(w), 559(w), 499(m).

## Crystal Structure Determination

Single crystal of **1** was manually harvested from crystallisation vials and mounted on Hampton Research CryoLoops using FOMBLIN Y perfluoropolyether vacuum oil with the help of a Stemi 2000 stereomicroscope equipped with Carl Zeiss lenses. Data was collected on a XtaLAB Synergy R, HyPix diffractometer (Rigaku Oxford diffraction) equipped with a PhotonJet R (Cu) X-ray radiation source ( $\lambda = 1.54184 \text{ \AA}$ ) at 179.99(10) K by the  $\omega$  scan measurement method and reduced by

CrysAlisPro 1.171.40.19a (Rigaku OD, 2018) program. The crystal structure of **1** was refined by ShelXL-2014/7 and solved by direct method using ShelXS-2014/7 of crystallographic software and refined by full-matrix least-squares technique on  $F^2$ .<sup>3</sup> All non-hydrogen atoms were refined anisotropically. Hydrogen atoms were located at geometrically calculated positions to their carrier atoms and refined with isotropic thermal parameters included in the final stage of the refinement.

Crystallographic data (excluding structure factors) for **1** reported in this paper has been deposited with the Cambridge Crystallographic Data Centre (the deposition CCDC number: 2027427). The data can be obtained free of charge from The Cambridge Crystallographic Data Centre via [www.ccdc.cam.ac.uk/data\\_request/cif](http://www.ccdc.cam.ac.uk/data_request/cif).

### Fluorescence measurement of **3** in different solvents.

2 mg **3** was dispersed into 2 mL eleven kinds of solvents respectively, including tetrahydrofuran (THF), carbon tetrachloride (CCl<sub>4</sub>), cyclohexane, dimethylformamide (DMF), 1,4-dioxane, chloroform, N,N-dimethylacetamide (DMAC), isopropanol, ethanol, methanol and water. After 1 min vibration, the above suspensions were immediately transferred to 4 mL cuvettes for fluorescence measurement.

### pH detection

2 mg **3** was dispersed into 2 mL HCl or NaOH aqueous solutions with pH ranging 1-13, vibrating for 1 min, then immediately transferred to a 4 mL cuvette for fluorescence measurement.

### Detection of water content in DMF.

2 mg **3** was dispersed in DMF solutions with different water contents (v/v %, V<sub>H<sub>2</sub>O</sub>%). After vibrating for 1 min, the suspension was immediately transferred to a 4 mL cuvette for fluorescence measurement.

### Preparation of paper-based sensors.

Test paper Whatman 1# was cut into small discs with a diameter of 0.5 cm. 5 mg **3** was dispersed in a 5 mL absolute ethanol, then vibrated for 1 minute, next the test paper was immersed in the solution for 10 min, finally the test paper was dried in an oven at 60 °C to obtain paper-based sensors.

**Table S1.** EDS analysis of **3**.

| Compound | Element | At%1  | At%2  | At%3  | Average At% | Average |
|----------|---------|-------|-------|-------|-------------|---------|
| <b>3</b> | EuL     | 00.21 | 00.05 | 00.21 | 0.47        | 1:18.55 |

**Table S2.** The structural determination and refinement data for **1**.

|                                               |                                  |
|-----------------------------------------------|----------------------------------|
| Empirical formula                             | $C_{14}H_{10}ClEuO_6$            |
| Color and Habit                               | Colorless platelet               |
| Crystal Size ( $mm^3$ )                       | $0.22 \times 0.20 \times 0.06$   |
| Crystal system                                | monoclinic                       |
| Space group                                   | $P2_1/c$                         |
| $a$ (Å)                                       | 15.35720(10)                     |
| $b$ (Å)                                       | 11.16410(10)                     |
| $c$ (Å)                                       | 8.40850(10)                      |
| $\beta$ (°)                                   | 97.7260(10)                      |
| $V$ (Å <sup>3</sup> )                         | 1428.54(2)                       |
| $Z$                                           | 4                                |
| $F_w$                                         | 461.63                           |
| $D_{calcd}$ (Mg·m <sup>-3</sup> )             | 2.146                            |
| $\mu$ (mm <sup>-1</sup> )                     | 33.413                           |
| $F(000)$                                      | 888                              |
| $\theta$ (°)                                  | 2.904 to 75.990                  |
| Reflections measured                          | 11560                            |
| Independent reflections                       | 2864 [ $R_{int} = 0.0258$ ]      |
| Final $R_1$ , $wR_2$ indices (obs.)           | $R_1 = 0.0185$ , $wR_2 = 0.0465$ |
| $R_1$ , $wR_2$ indices (all)                  | $R_1 = 0.0210$ , $wR_2 = 0.0476$ |
| $S$                                           | 1.010                            |
| $(\Delta\rho)_{max/min}$ (e·Å <sup>-3</sup> ) | 0.949/-0.464                     |

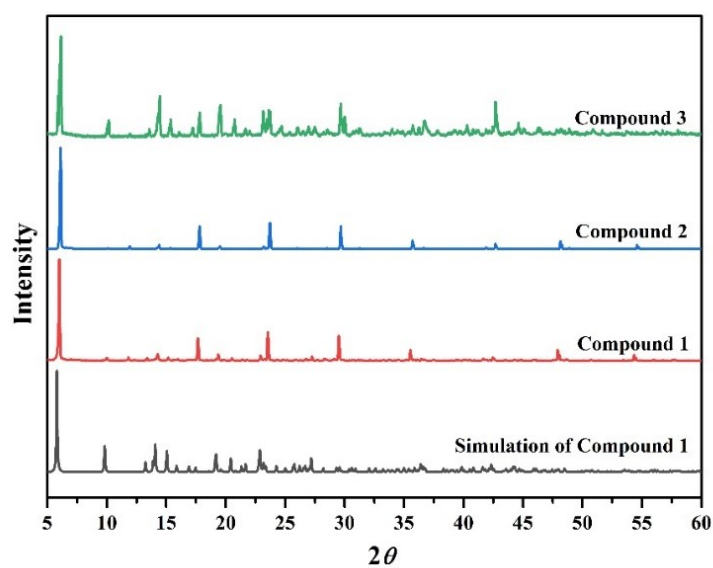

**Fig. S1.** Simulated and experimental PXRD patterns of **1-3**.

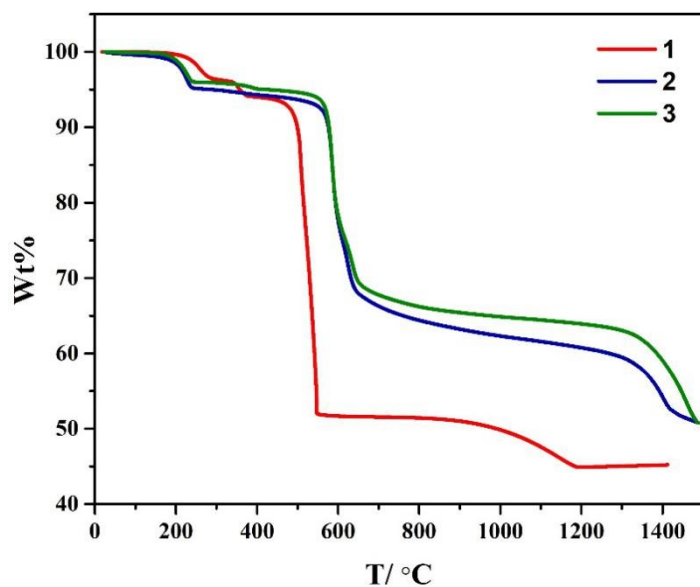

Fig. S2. TG curves of 1-3.

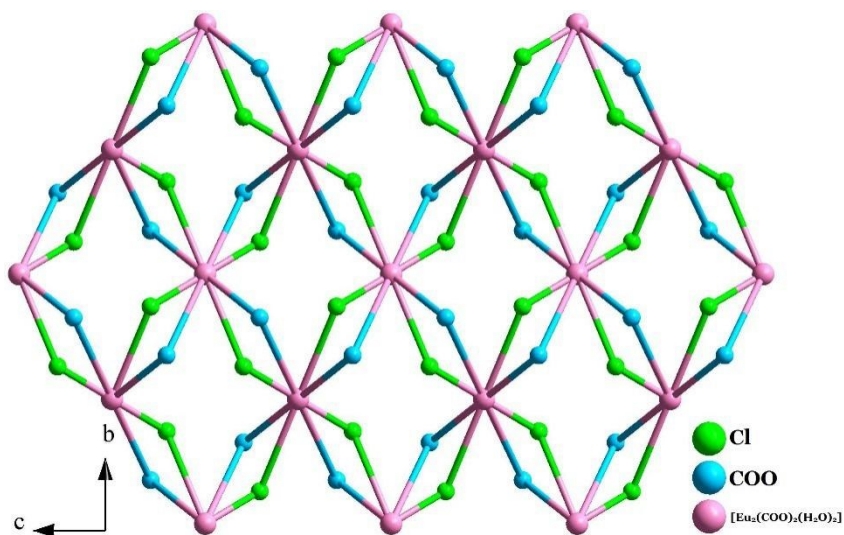

Fig. S3. The topological  $\{4^4.8^{16}.12^8\} \{4\}_4$  2D layer in 1.

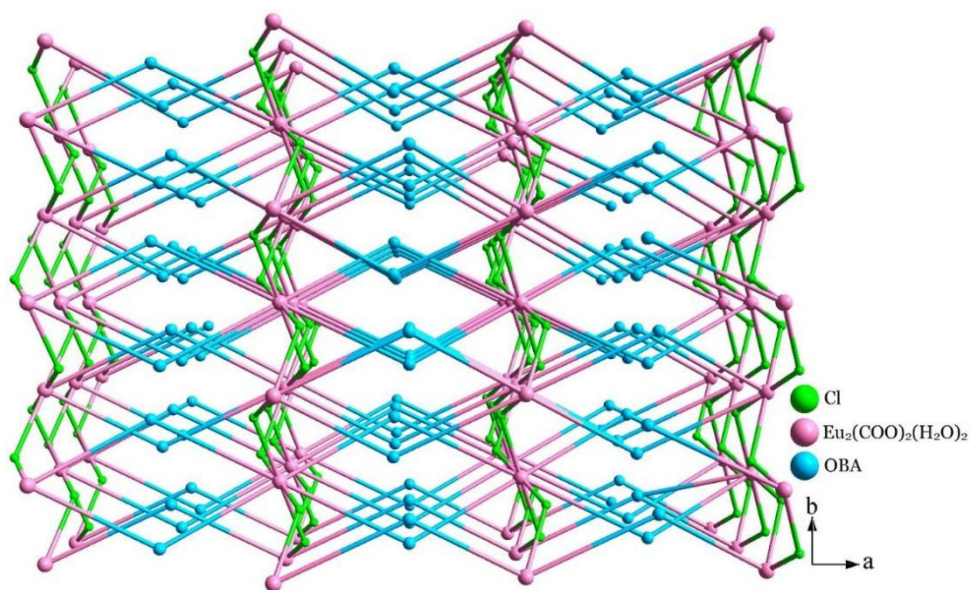

Fig. S4. The topological 2,2,8-connected 3-nodal  $\{4^2.8^{20}.12^6\} \{4\}_2 \{8\}_2$  network in 1.

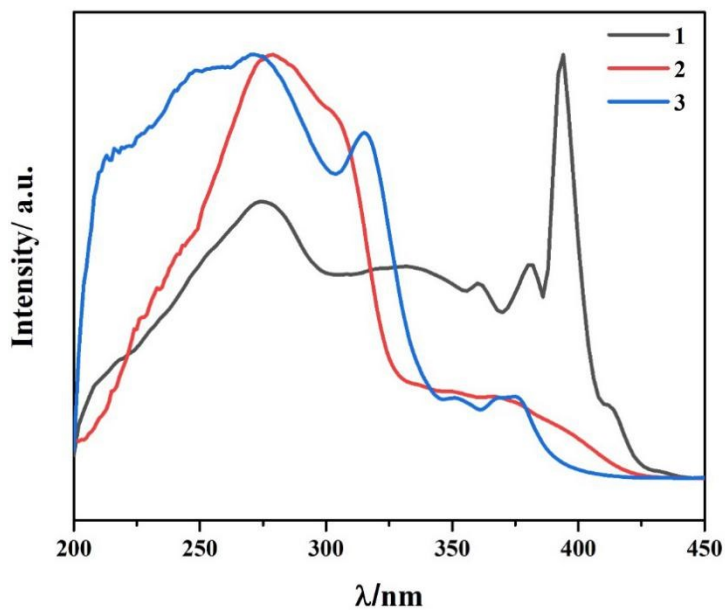

Fig. S5. The excitation spectra of 1-3.

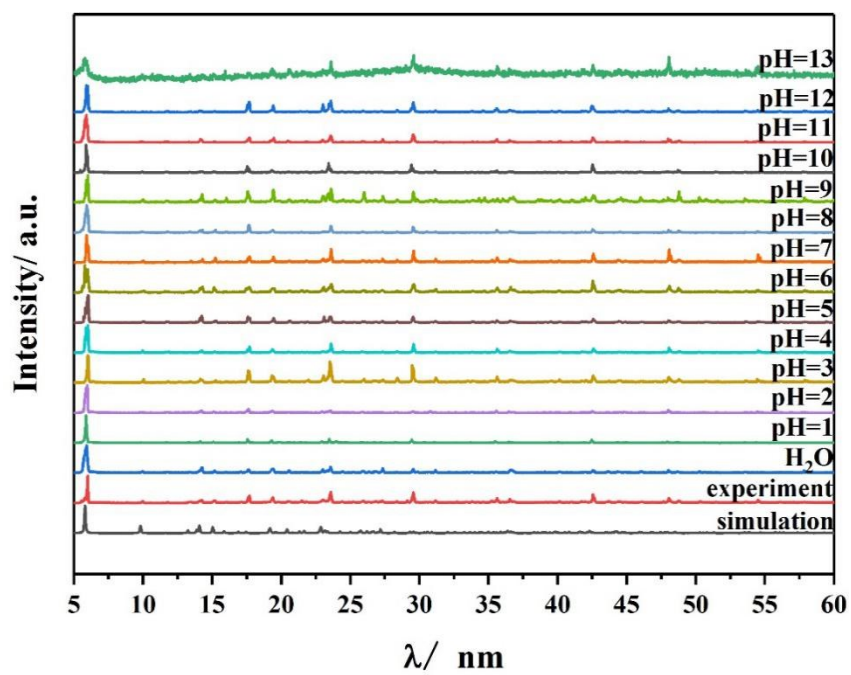

Fig. S6. PXRD patterns of 3 immersed in HCl or NaOH solutions with pH = 1-13 for 2 h.

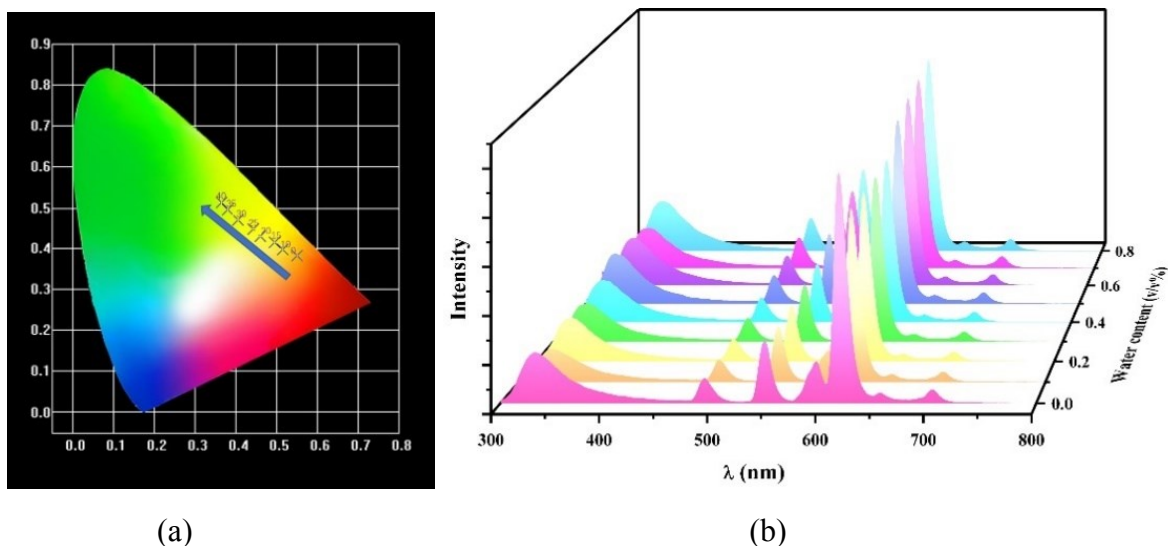

**Fig. S7.** (a) The CIE 1931 chromaticity diagram of **3** with water content ranging 0-40%; (b) the emission spectra of **3** in DMF solution with 0-0.8% water.

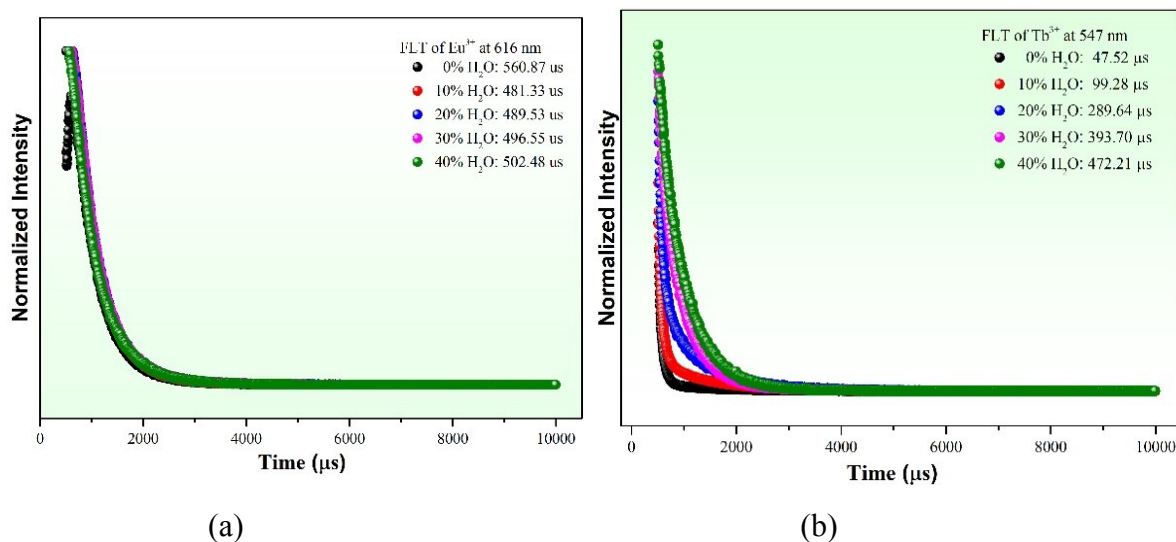

**Fig. S8.** Fluorescence lifetimes of the emissions at 616 nm (a) and 547 nm (b) in **3** with water content ranging 0-40%.

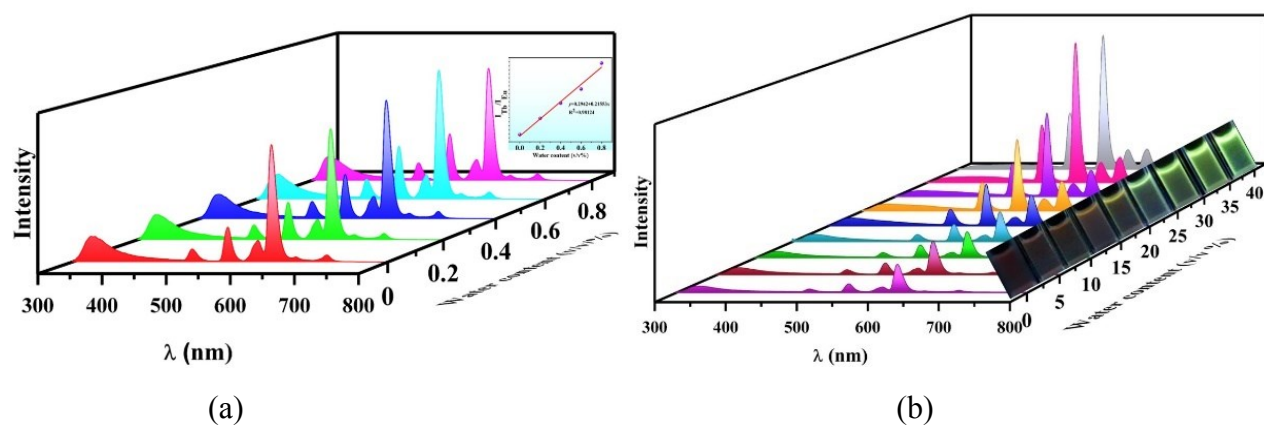

**Fig. S9.** (a) The emission spectra of **3** in DMAC solution with 0-0.8% and (b) 1-40% water content (inset: photos of emission colors taken under 254 nm UV lamp).

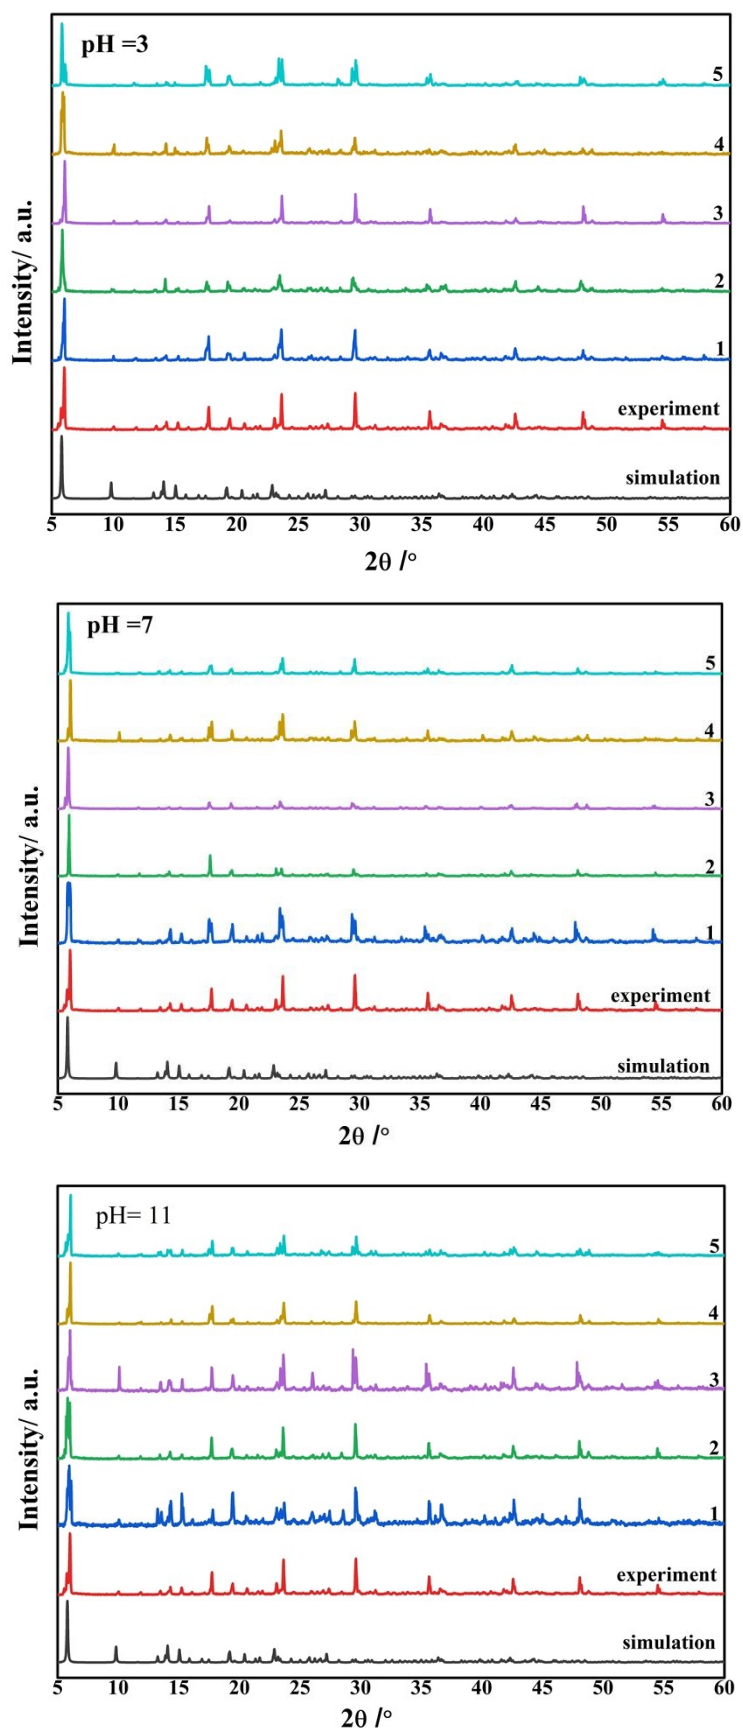

**Fig. S10.** The PXRD patterns of **3** after five detection cycles at pH = 3, 7, and 11.



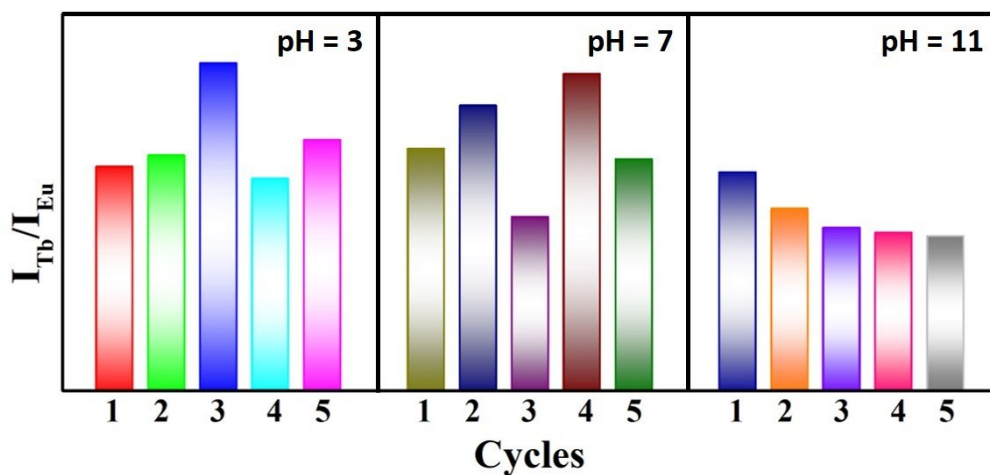

**Fig. S11.** The relative emission intensities  $I_{Tb}/I_{Eu}$  of **3** for five detection cycles.

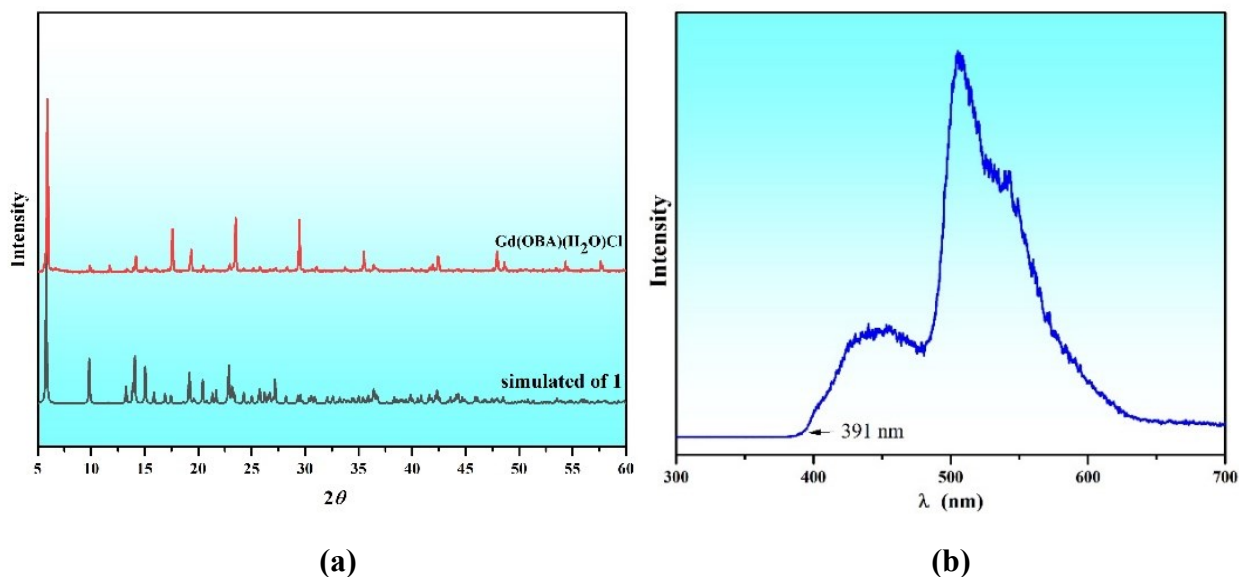

**Fig. S12.** (a) The PXRD pattern of  $[Gd(OBA)(H_2O)Cl]$  compared to **1**; (b) the low-temperature phosphorescence spectrum of  $[Gd(OBA)(H_2O)Cl]$  excited at 270 nm at 77 K.

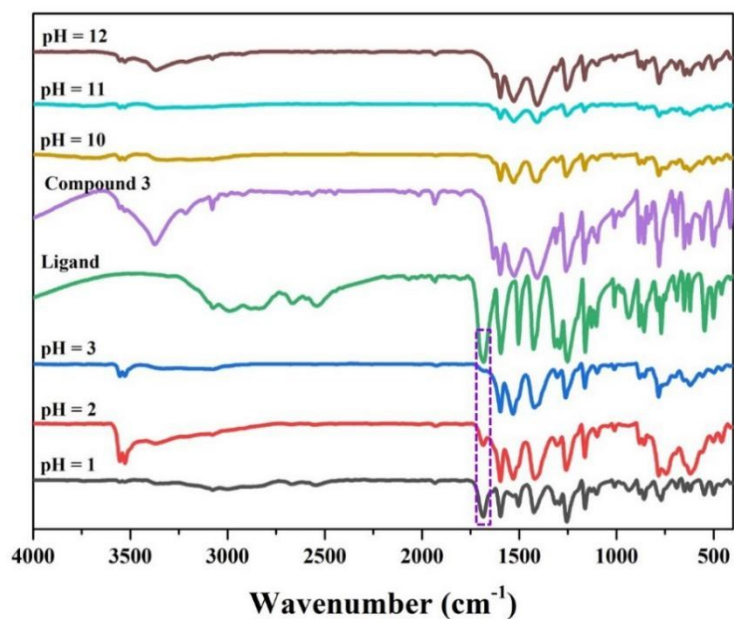

**Fig. S13.** FT- IR spectra of free H<sub>2</sub>OBA, **3** and **3** immersed in HCl and NaOH solutions with pH = 1-3 and 10-12.

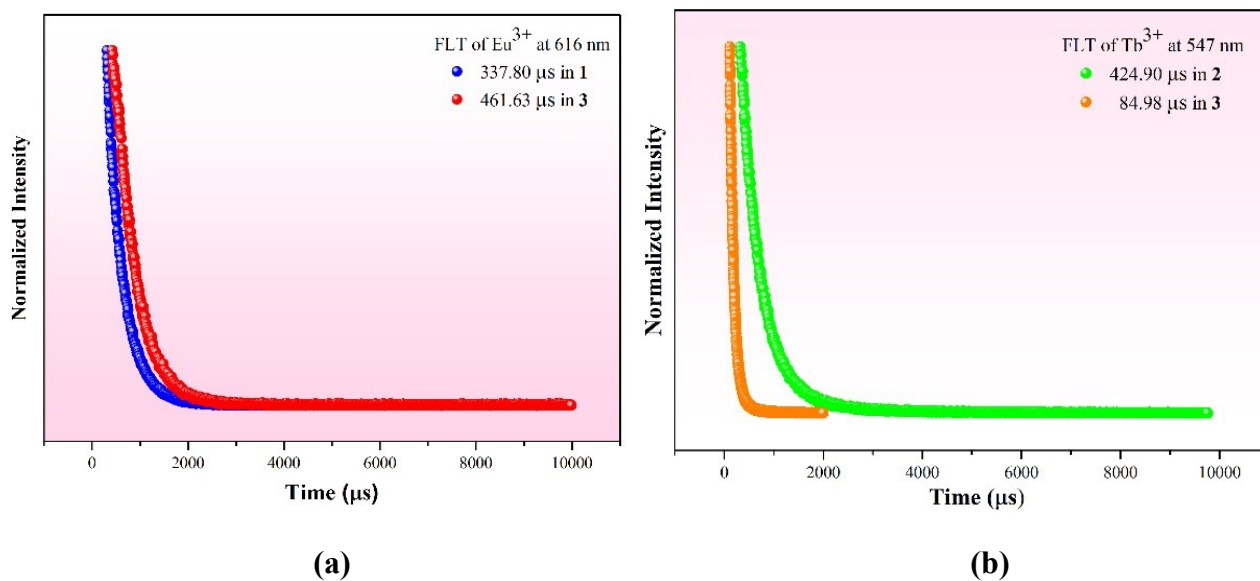

**Fig. S14.** Fluorescence lifetimes of the emissions  ${}^5D_0 \rightarrow {}^7F_2$  of  $\text{Eu}^{3+}$  at 616 nm in **1** and **3** (a) and  ${}^5D_4 \rightarrow {}^7F_5$  of  $\text{Tb}^{3+}$  at 547 nm in **2** and **3** (b).

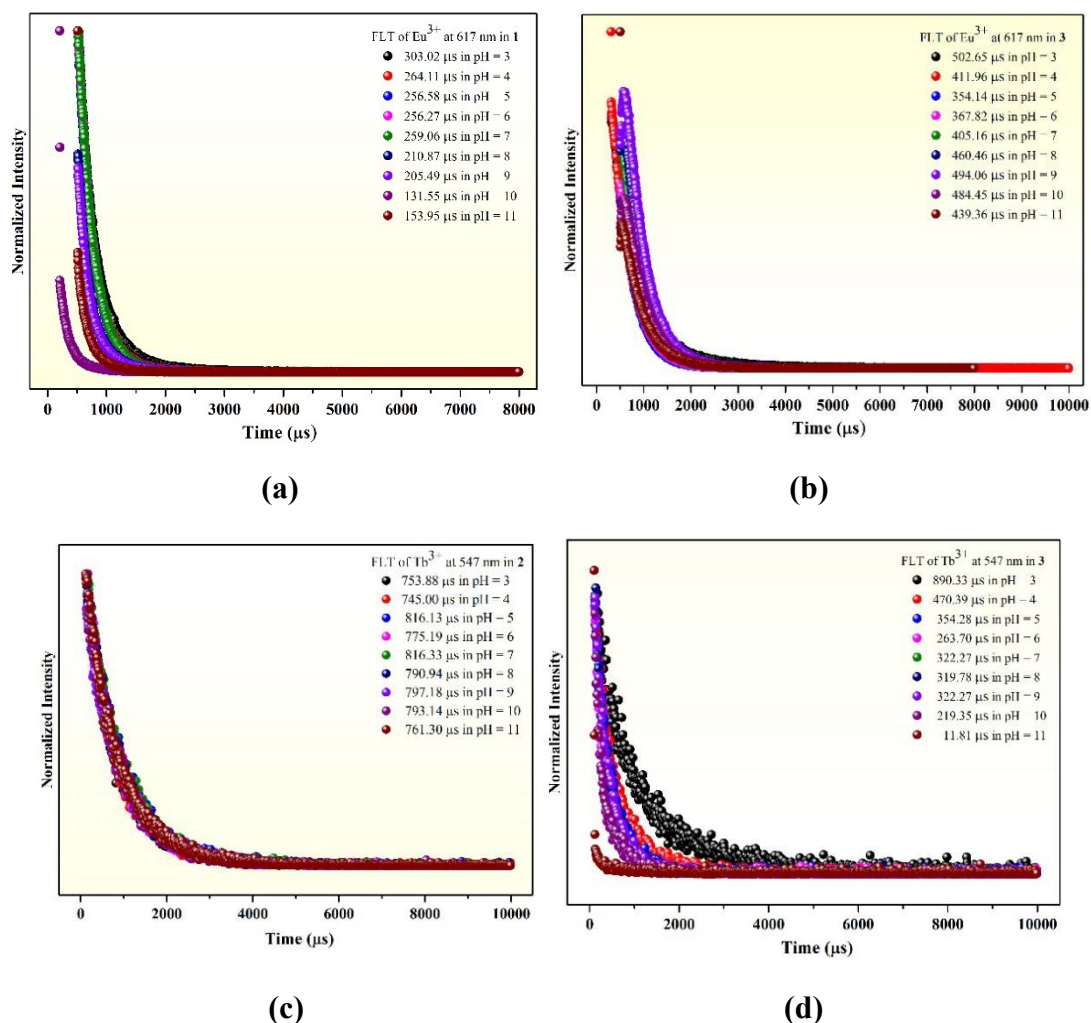

**Fig. S15.** Fluorescence lifetimes of the emissions  ${}^5\text{D}_0 \rightarrow {}^7\text{F}_2$  of  $\text{Eu}^{3+}$  at 616 nm in **1** and **3** (a and b) and  ${}^5\text{D}_4 \rightarrow {}^7\text{F}_5$  of  $\text{Tb}^{3+}$  at 547 nm in **2** and **3** (c and d) as pH = 3-11.

## References

1. E. R. Parnham and R. E. Morris, 1-alkyl-3-methyl imidazolium bromide ionic liquids in the ionothermal synthesis of aluminium phosphate molecular sieves, *Chem. Mater.*, 2006, **18**, 4882-4887.
2. P. Bonhote, A. P. Dias, N. Papageorgiou, K. Kalyanasundaram and M. Cratzel, Hydrophobic, highly conductive ambient-temperature molten salts, *Inorg. Chem.*, 1996, **35**, 1168-1178.
3. G. M. Sheldrick, SHELXS-2014, Program for structure solution; Universität of Göttingen: Germany, 2014.
